# Supplementary material
Source: Springer Nature journal article supplement (https://www.springermedizin.de/resource/supplementary/12913_2007_744_MOESM1_ESM.pdf/9535454)

### Decubitus Ulcer

Impact of POA

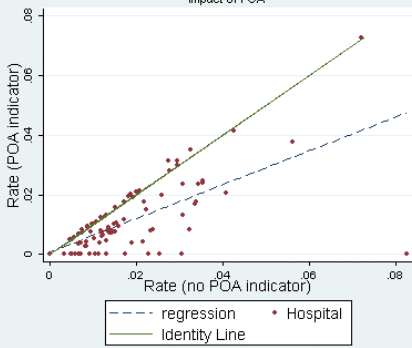

### Failure to Rescue

Impact of POA

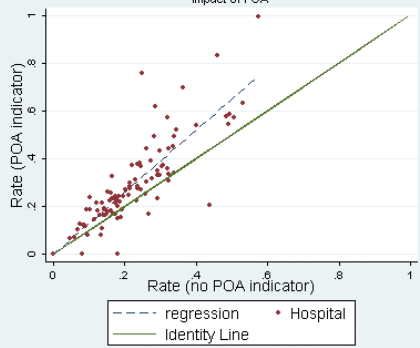

### Infection

Impact of POA

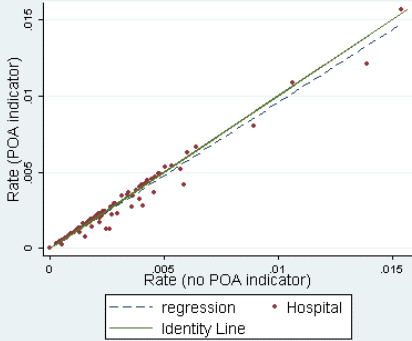

### Postop Hemorrhage

Impact of POA

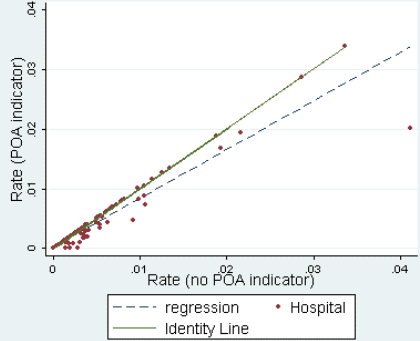

### Postop Metabolic

Impact of POA

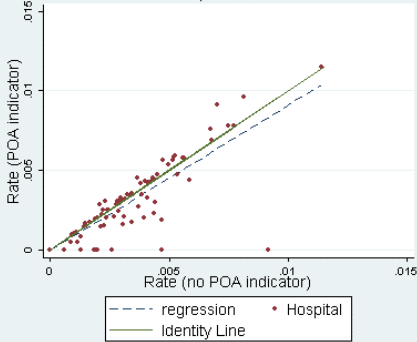

### DVT or PE

Impact of POA

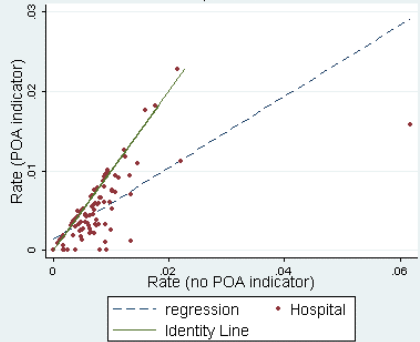

### Postop Sepsis

Impact of POA

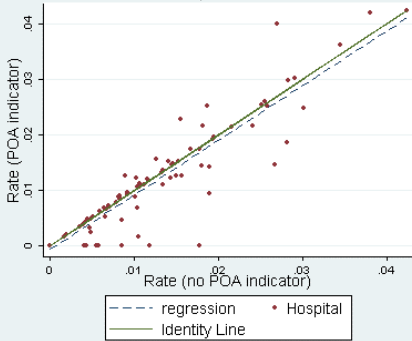

### Accidental Puncture/Laceration

Impact of POA

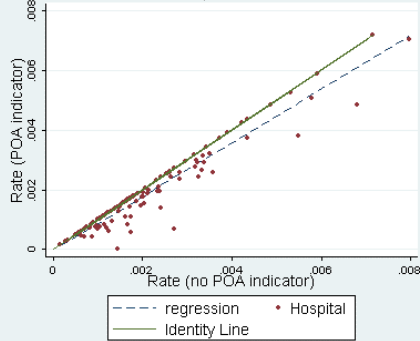

Supplement: MOESM1 [file 9535454]
